# Supplementary material
Source: PubMed Central journal article supplement (PMC5198488)
Supplement: JB.00703-16_zjb999094299s1.pdf [file JB.00703-16_zjb999094299s1.pdf]

## **Supporting information**

### **The role of ribonuclease Y in *Clostridium perfringens* mRNA decay and processing**

**Nozomu Obana\*, Kouji Nakamura, Nobuhiko Nomura**

Faculty of Life and Environmental Sciences, University of Tsukuba, Tsukuba-Shi, Ibaraki  
305-8572, Japan

\*Corresponding author. Tel: +81-298-53-5079; Fax: +81-298-53-7723

E-mail: [obana.nozomu.gb@u.tsukuba.ac.jp](mailto:obana.nozomu.gb@u.tsukuba.ac.jp)

**Supplementary tables S1-S4**

**Supplementary figures S1-S6**

**Supplementary table S1. Oligonucleotides used in this study**

| Name     | Sequence 5' to 3'                    | Used for                           |
|----------|--------------------------------------|------------------------------------|
| NOB-0642 | GCGgagctcCATACATTAATAATTATTAAGAAGTGA | <i>rny</i> mutant construction     |
| NOB-0643 | GGCCgtcgacGGATGCTGTTTCTACTGGA        | <i>rny</i> mutant construction     |
| NOB-0644 | GGCCggatccGTAGTAGGAATACTTATAGGA      | <i>rny</i> mutant construction     |
| NOB-0645 | GCGCctgcagCATTAATCCTGCTAAATATG       | <i>rny</i> mutant construction     |
| NOB-0488 | GGCCgagctcAAGTCTAATTAAGACTTTAG       | <i>bgaL</i> promoter amplification |
| NOB-0489 | GCGCggatccCATTTTACCCTCCCAATACA       | <i>bgaL</i> promoter amplification |
| NOB-0572 | GGCCggatccGTAGTAGGAATACTTATAGG       | <i>rny</i> probe                   |
| NOB-0573 | GCGCgtcgacACTGAAATCATTAGTAGAG        | <i>rny</i> probe                   |
| NOB-0265 | GTTCGAAGGAGATGTGTTAAGTGGTTAAAG       | <i>luxS</i> probe                  |
| NOB-0266 | GCGCGGATCCCTCTACATAAAATTTATCAC       | <i>luxS</i> probe                  |
| NOB-0127 | TTTTTTAACTATACTTATAGCATTTTTAC        | CPE0514 probe                      |
| NOB-0128 | CTTCTTACTCAATTTAAATTACCTCCCAG        | CPE0514 probe                      |
| NOB-0372 | GTTTAGTATTGCCTTATGTGAAGATAATTC       | <i>virR</i> probe                  |
| NOB-0373 | CTTTTCTAGTTTATTCATACTCATCTTTAC       | <i>virR</i> probe                  |
| NOB-0515 | GCGCGTCGACCACACCAAATATATTGGTA        | <i>pilD</i> 5'RLM-RACE outer       |
| NOB-0601 | GCGCggatccAAAACCTCCAATTATTAATCC      | <i>pilD</i> 5'RLM-RACE inner       |
| NOB-0539 | ACTGATGCTGATGTGTTTGA                 | <i>pilA2</i> 5'RLM-RACE outer      |
| NOB-0585 | GCGCtctagaACTCTTGATTTTCTTTGAATTG     | <i>pilA2</i> 5'RLM-RACE inner      |
| NOB-0717 | ATGGCTTTTGATGGATTAGC                 | <i>ffh</i> probe                   |
| NOB-0718 | TTAACCTTATCTCCCATGAG                 | <i>ffh</i> probe                   |
| NOB-0719 | GGAAGTTATAGCGATAGAGAAG               | <i>secA</i> probe                  |
| NOB-0720 | TATGCTTCTCTTCTTTGGTC                 | <i>secA</i> probe                  |
| NOB-0721 | CAGTTCTTGCTGCTACAATG                 | <i>cwI</i> O probe                 |
| NOB-0722 | CGGCAGTCTTATCTTCTAATTC               | <i>cwI</i> O probe                 |

**Supplementary Table S2. Genes whose expression increased in RNase Y depletion.**

| Locus_Tag | Locus   | Product Name                            | Log2 ratio | p-value |
|-----------|---------|-----------------------------------------|------------|---------|
| CPE2585   | -       | nucleoside recognition domain protein   | 4.38       | 0.003   |
| CPE1002   | -       | hypothetical protein CPE1002            | 3.80       | 0.036   |
| CPE0070   | -       | phosphotransbutyrylase                  | 3.45       | 0.035   |
| CPE1234   | nagJ    | hyaluronidase                           | 3.44       | 0.007   |
| CPE0863   | -       | hypothetical protein CPE0863            | 3.40       | 0.001   |
| CPE2295   | lepW    | signal peptidase type I                 | 3.40       | 0.020   |
| CPE2520   | -       | hydrolase, TatD family                  | 3.23       | 0.043   |
| CPE0068   | glgC    | glucose-1-phosphate adenylyltransferase | 2.98       | 0.012   |
| CPE2306   | -       | hypothetical protein CPE2306            | 2.94       | 0.039   |
| CPE1763   | spolIGA | sporulation factor SpolIGA              | 2.92       | 0.004   |
| CPE0263   | -       | hypothetical protein CPE0263            | 2.90       | 0.008   |
| CPE0019   | -       | hypothetical protein CPE0019            | 2.89       | 0.020   |
| CPE0202   | spolIQ  | cell wall-binding protein               | 2.88       | 0.030   |
| CPE0472   | -       | ABC transporter                         | 2.85       | 0.027   |
| CPE0080   | -       | hypothetical protein CPE0080            | 2.77       | 0.002   |
| CPE1713   | ffh     | signal recognition particle protein     | 2.75       | 0.012   |
| CPE0602   | -       | amino acid ABC transporter              | 2.71       | 0.038   |
| CPE1805   | scpA    | segregation and condensation protein A  | 2.67       | 0.002   |
| CPE1279   | nagK    | hyaluronidase                           | 2.61       | 0.001   |
| CPE0166   | -       | membrane-spanning transporter protein   | 2.52       | 0.001   |
| CPE0176   | metB    | cystathionine beta-lyase                | 2.52       | 0.025   |
| CPE0072   | -       | hypothetical protein CPE0072            | 2.48       | 0.001   |
| CPE0035   | ypIC    | hypothetical protein CPE0035            | 2.47       | 0.049   |
| CPE0024   | -       | ErfK/YbiS/YcfS/YnhG family protein      | 2.46       | 0.038   |
| CPE1968   | potA    | spermidine/putrescine ABC transporter   | 2.45       | 0.041   |
| CPE2534   | -       | hypothetical protein CPE2534            | 2.45       | 0.007   |
| CPE0514   | -       | signal peptidase type I                 | 2.45       | 0.003   |
| CPE0071   | clsA    | cardiolipin synthase                    | 2.38       | 0.001   |
| CPE2305   | -       | hypothetical protein CPE2305            | 2.37       | 0.005   |
| CPE1305   | -       | transcriptional regulator               | 2.32       | 0.002   |
| CPE1421   | -       | hypothetical protein CPE1421            | 2.31       | 0.049   |
| CPE2368   | -       | hypothetical protein CPE2368            | 2.31       | 0.000   |
| CPE0062   | -       | hypothetical protein CPE0062            | 2.29       | 0.008   |

|         |      |                                           |      |       |
|---------|------|-------------------------------------------|------|-------|
| CPE0554 | -    | hypothetical protein CPE0554              | 2.25 | 0.024 |
| CPE1369 | -    | GNAT family acetyltransferase             | 2.25 | 0.001 |
| CPE2327 | glmS | D-fructose-6-phosphate amidotransferase   | 2.22 | 0.007 |
| CPE0987 | pfoS | regulatory protein                        | 2.19 | 0.029 |
| CPE1380 | -    | hypothetical protein CPE1380              | 2.18 | 0.041 |
| CPE1759 | nrdR | transcriptional regulator NrdR            | 2.18 | 0.019 |
| CPE2244 | -    | hypothetical protein CPE2244              | 2.15 | 0.037 |
| CPE1597 | -    | hypothetical protein CPE1597              | 2.12 | 0.026 |
| CPE0167 | pbg  | beta-galactosidase                        | 2.09 | 0.022 |
| CPE2521 | -    | hypothetical protein CPE2521              | 2.09 | 0.011 |
| CPE0278 | cwIO | hypothetical protein CPE0278              | 2.09 | 0.014 |
| CPE1455 | -    | hypothetical protein CPE1455              | 2.07 | 0.037 |
| CPE0600 | -    | amino acid ABC transporter                | 2.05 | 0.003 |
| CPE2320 | -    | hypothetical protein CPE2320              | 2.03 | 0.029 |
| CPE1804 | scpB | segregation and condensation protein B    | 2.02 | 0.020 |
| CPE0690 | argH | argininosuccinate lyase                   | 1.99 | 0.002 |
| CPE1030 | -    | hypothetical protein CPE1030              | 1.98 | 0.001 |
| CPE1910 | -    | single-strand DNA-binding protein         | 1.95 | 0.007 |
| CPE0576 | -    | ABC transporter                           | 1.95 | 0.019 |
| CPE0672 | -    | hypothetical protein CPE0672              | 1.93 | 0.001 |
| CPE0012 | -    | hypothetical protein CPE0012              | 1.91 | 0.013 |
| CPE0452 | entC | enterotoxin                               | 1.88 | 0.019 |
| CPE0360 | dnaE | DNA polymerase III DnaE                   | 1.88 | 0.040 |
| CPE0177 | cysK | cysteine synthase family protein          | 1.88 | 0.037 |
| CPE1366 | -    | hypothetical protein CPE1366              | 1.87 | 0.045 |
| CPE2315 | -    | sortase family protein                    | 1.87 | 0.012 |
| CPE1660 | feoB | ferrous iron transport protein B          | 1.87 | 0.038 |
| CPE0605 | -    | cation efflux family protein              | 1.87 | 0.038 |
| CPE1940 | -    | DHH domain protein                        | 1.85 | 0.022 |
| CPE0391 | -    | phosphoesterase                           | 1.84 | 0.001 |
| CPE1659 | feoA | ferrous iron transport protein A          | 1.84 | 0.021 |
| CPE0058 | -    | hypothetical protein CPE0058              | 1.83 | 0.011 |
| CPE0706 | -    | hypothetical protein CPE0706              | 1.83 | 0.039 |
| CPE2612 | dnaD | chromosome replication initiation protein | 1.82 | 0.007 |
| CPE1498 | -    | hypothetical protein CPE1498              | 1.82 | 0.038 |

|         |      |                                                      |      |       |
|---------|------|------------------------------------------------------|------|-------|
| CPE1257 | -    | hypothetical protein CPE1257                         | 1.79 | 0.001 |
| CPE2365 | -    | hypothetical protein CPE2365                         | 1.79 | 0.049 |
| CPE0490 | -    | hypothetical protein CPE0490                         | 1.77 | 0.011 |
| CPE1985 | -    | TspO/MBR family protein                              | 1.75 | 0.003 |
| CPE0138 | -    | hypothetical protein CPE0138                         | 1.75 | 0.017 |
| CPE0133 | -    | CAAX amino terminal protease family protein          | 1.74 | 0.024 |
| CPE2363 | -    | two-component sensor histidine kinase                | 1.73 | 0.019 |
| CPE1969 | potB | spermidine/putrescine ABC transporter                | 1.71 | 0.018 |
| CPE2652 | soj  | sporulation initiation inhibitor protein soj         | 1.70 | 0.012 |
| CPE2519 | -    | 3D/G5 domain protein                                 | 1.68 | 0.027 |
| CPE2153 | guaB | inosine-5'-monophosphate dehydrogenase               | 1.68 | 0.012 |
| CPE0515 | -    | hypothetical protein CPE0515                         | 1.67 | 0.021 |
| CPE0597 | sipS | signal peptidase type I                              | 1.66 | 0.020 |
| CPE2138 | minD | septum site-determining protein MinD                 | 1.66 | 0.000 |
| CPE2154 | -    | exonuclease family protein                           | 1.66 | 0.012 |
| CPE2613 | dnaC | DNA replication protein DnaC                         | 1.65 | 0.023 |
| CPE2048 | sigF | sporulation sigma factor SigF                        | 1.63 | 0.021 |
| CPE2245 | -    | hypothetical protein CPE2245                         | 1.63 | 0.000 |
| CPE2006 | -    | hypothetical protein CPE2006                         | 1.63 | 0.031 |
| CPE1694 | -    | 1-deoxy-D-xylulose 5-phosphate reductoisomerase      | 1.61 | 0.034 |
| CPE0104 | -    | hypothetical protein CPE0104                         | 1.59 | 0.005 |
| CPE0345 | -    | hypothetical protein CPE0345                         | 1.58 | 0.038 |
| CPE0831 | bgaL | beta-galactosidase                                   | 1.58 | 0.036 |
| CPE0488 | -    | capsular polysaccharide biosynthesis protein         | 1.58 | 0.033 |
| CPE0603 | -    | hypothetical protein CPE0603                         | 1.56 | 0.002 |
| CPE0871 | -    | hypothetical protein CPE0871                         | 1.56 | 0.001 |
| CPE2459 | murD | UDP-N-acetylmuramoyl-L-alanyl-D-glutamate synthetase | 1.55 | 0.023 |
| CPE0217 | ackA | acetate kinase                                       | 1.55 | 0.005 |
| CPE2263 | -    | hypothetical protein CPE2263                         | 1.55 | 0.001 |
| CPE1526 | -    | ABC transporter                                      | 1.53 | 0.000 |
| CPE0333 | -    | cation-transporting ATPase                           | 1.53 | 0.012 |
| CPE0077 | -    | hypothetical protein CPE0077                         | 1.53 | 0.037 |
| CPE0175 | ycgJ | methyltransferase, UbiE/COQ5 family                  | 1.52 | 0.011 |
| CPE1813 | -    | phosphorylation-activated transcription factor       | 1.52 | 0.008 |
| CPE2535 | -    | MATE efflux family protein                           | 1.51 | 0.006 |

|         |       |                                                             |      |       |
|---------|-------|-------------------------------------------------------------|------|-------|
| CPE0516 | -     | hypothetical protein CPE0516                                | 1.51 | 0.030 |
| CPE2258 | -     | hypothetical protein CPE2258                                | 1.50 | 0.030 |
| CPE2139 | minC  | septum formation inhibitor                                  | 1.50 | 0.001 |
| CPE0033 | -     | hypothetical protein CPE0033                                | 1.50 | 0.034 |
| CPE1962 | pbpA  | penicillin-binding proteins 1A/1B                           | 1.50 | 0.038 |
| CPE0061 | -     | integral membrane transport protein                         | 1.50 | 0.010 |
| CPE1426 | -     | hypothetical protein CPE1426                                | 1.50 | 0.000 |
| CPE1343 | mgIC  | beta-methylgalactoside transporter inner membrane component | 1.49 | 0.010 |
| CPE2229 | -     | PTS system protein                                          | 1.46 | 0.004 |
| CPE2005 | -     | hypothetical protein CPE2005                                | 1.45 | 0.001 |
| CPE2514 | -     | prolipoprotein diacylglyceryl transferase                   | 1.45 | 0.025 |
| CPE1515 | -     | putative lipoprotein                                        | 1.44 | 0.021 |
| CPE0288 | -     | flavoprotein                                                | 1.44 | 0.040 |
| CPE2074 | -     | trans-2-enoyl-CoA reductase                                 | 1.44 | 0.003 |
| CPE0485 | -     | capsular polysaccharide biosynthesis protein                | 1.43 | 0.025 |
| CPE1634 | tagO  | undecaprenyl-phosphate N-acetylglucosaminyltransferase      | 1.42 | 0.003 |
| CPE2343 | -     | maltose ABC transporter                                     | 1.40 | 0.006 |
| CPE0111 | -     | hypothetical protein CPE0111                                | 1.39 | 0.033 |
| CPE1846 | dapF  | diaminopimelate epimerase                                   | 1.39 | 0.010 |
| CPE1525 | -     | ABC transporter                                             | 1.39 | 0.042 |
| CPE0473 | -     | UDP-galactose phosphate transferase                         | 1.38 | 0.004 |
| CPE1174 | exoA  | exodeoxyribonuclease III                                    | 1.37 | 0.006 |
| CPE1762 | sigE  | sporulation sigma factor SigE                               | 1.37 | 0.007 |
| CPE2505 | -     | MATE efflux family protein                                  | 1.37 | 0.007 |
| CPE0110 | thiH  | thiamine biosynthesis protein ThiH                          | 1.35 | 0.044 |
| CPE2472 | -     | tRNA(Ile)-lysidine synthetase                               | 1.35 | 0.002 |
| CPE0988 | sdhB  | L-serine dehydratase beta subunit                           | 1.34 | 0.002 |
| CPE0463 | -     | capsular polysaccharide biosynthesis protein                | 1.34 | 0.006 |
| CPE0870 | -     | two-component sensor histidine kinase                       | 1.34 | 0.033 |
| CPE2651 | spo0J | stage 0 sporulation protein J                               | 1.34 | 0.010 |
| CPE2513 | -     | putative lipoprotein                                        | 1.33 | 0.034 |
| CPE2483 | prsA  | peptidylprolyl isomerase                                    | 1.32 | 0.045 |
| CPE1379 | -     | D-alanyl-D-alanine carboxypeptidase                         | 1.32 | 0.010 |
| CPE0781 | -     | metallo-beta-lactamase family protein                       | 1.31 | 0.031 |

|         |         |                                                               |      |       |
|---------|---------|---------------------------------------------------------------|------|-------|
| CPE1186 | uppP    | undecaprenyl pyrophosphate phosphatase                        | 1.28 | 0.015 |
| CPE0027 | -       | hypothetical protein CPE0027                                  | 1.26 | 0.021 |
| CPE0032 | -       | hypothetical protein CPE0032                                  | 1.26 | 0.021 |
| CPE1153 | pflA    | formate acetyltransferase                                     | 1.26 | 0.005 |
| CPE1967 | -       | DNA-binding protein                                           | 1.26 | 0.027 |
| CPE2329 | glmM    | phosphoglucosamine mutase                                     | 1.26 | 0.025 |
| CPE2591 | -       | phage infection protein                                       | 1.26 | 0.028 |
| CPE1504 | -       | hypothetical protein CPE1504                                  | 1.25 | 0.027 |
| CPE0475 | -       | capsular polysaccharide biosynthesis protein                  | 1.25 | 0.007 |
| CPE0518 | -       | DNA-binding response regulator                                | 1.25 | 0.015 |
| CPE2658 | -       | hypothetical protein CPE2658                                  | 1.23 | 0.006 |
| CPE2362 | -       | ArsC family protein                                           | 1.23 | 0.016 |
| CPE1929 | glyA    | serine hydroxymethyltransferase                               | 1.23 | 0.026 |
| CPE0868 | alr     | alanine racemase                                              | 1.23 | 0.017 |
| CPE2650 | -       | hypothetical protein CPE2650                                  | 1.22 | 0.010 |
| CPE1200 | -       | hypothetical protein CPE1200                                  | 1.21 | 0.038 |
| CPE0081 | glcK    | glucose kinase                                                | 1.20 | 0.045 |
| CPE1708 | rplS    | 50S ribosomal protein L19                                     | 1.20 | 0.050 |
| CPE1057 | -       | tetratricopeptide repeat protein                              | 1.19 | 0.003 |
| CPE0565 | -       | N-acetylmuramoyl-L-alanine amidase                            | 1.16 | 0.010 |
| CPE1999 | -       | hypothetical protein CPE1999                                  | 1.16 | 0.001 |
| CPE1176 | -       | hypothetical protein CPE1176                                  | 1.15 | 0.049 |
| CPE2657 | spoIIJ  | putative inner membrane protein translocase component<br>YidC | 1.15 | 0.030 |
| CPE2490 | glmU    | UDP-N-acetylglucosamine pyrophosphorylase                     | 1.15 | 0.039 |
| CPE0895 | -       | two-component response regulator                              | 1.14 | 0.005 |
| CPE1562 | -       | hypothetical protein CPE1562                                  | 1.13 | 0.036 |
| CPE1692 | ispG    | 4-hydroxy-3-methylbut-2-en-1-yl diphosphate synthase          | 1.13 | 0.043 |
| CPE1963 | -       | hypothetical protein CPE1963                                  | 1.13 | 0.008 |
| CPE2659 | rnpA    | ribonuclease P                                                | 1.13 | 0.000 |
| CPE0786 | apbA    | 2-dehydropantoate 2-reductase                                 | 1.12 | 0.011 |
| CPE0509 | galE    | UDP-glucose 4-epimerase                                       | 1.12 | 0.001 |
| CPE1964 | -       | amino acid carrier protein                                    | 1.10 | 0.028 |
| CPE0484 | -       | capsular polysaccharide biosynthesis protein                  | 1.10 | 0.031 |
| CPE2050 | spoIIAA | anti-sigma F factor antagonist                                | 1.10 | 0.004 |

|         |       |                                                |      |       |
|---------|-------|------------------------------------------------|------|-------|
| CPE0894 | pduV  | propanediol utilization protein                | 1.10 | 0.005 |
| CPE0457 | -     | DNA-binding response regulator                 | 1.09 | 0.003 |
| CPE2242 | -     | hypothetical protein CPE2242                   | 1.08 | 0.013 |
| CPE2342 | -     | maltose ABC transporter                        | 1.08 | 0.018 |
| CPE1761 | sigG  | sporulation sigma factor SigG                  | 1.08 | 0.028 |
| CPE1812 | spo0A | phosphorylation-activated transcription factor | 1.08 | 0.030 |
| CPE1563 | -     | hypothetical protein CPE1563                   | 1.08 | 0.031 |
| CPE2004 | -     | hypothetical protein CPE2004                   | 1.07 | 0.011 |
| CPE0464 | -     | spore coat polysaccharide biosynthesis protein | 1.07 | 0.044 |
| CPE0353 | murB  | UDP-N-acetylenolpyruvoylglucosamine reductase  | 1.06 | 0.022 |
| CPE2071 | -     | glycosyl transferase, group 2 family protein   | 1.06 | 0.014 |
| CPE0893 | pduU  | propanediol utilization protein                | 1.05 | 0.020 |
| CPE0865 | -     | hypothetical protein CPE0865                   | 1.03 | 0.008 |
| CPE2440 | -     | thioredoxin-disulfide reductase                | 1.02 | 0.017 |
| CPE2341 | -     | maltose ABC transporter                        | 1.01 | 0.039 |
| CPE0654 | relA  | relA/spoT family protein                       | 1.01 | 0.027 |
| CPE2599 | -     | hypothetical protein CPE2599                   | 1.00 | 0.001 |



**Supplementary Table S3. Genes whose expression decreased in RNase Y depletion.**

| <b>Locus_Tag</b> | <b>Locus</b> | <b>Product Name</b>                            | <b>Log2 ratio</b> | <b>p-value</b> |
|------------------|--------------|------------------------------------------------|-------------------|----------------|
| CPE0771          | bgaL         | beta-galactosidase                             | -5.72             | 0.025          |
| CPE0497          | -            | hypothetical protein CPE0497                   | -4.21             | 0.011          |
| CPE0498          | -            | hexosyltransferase                             | -3.98             | 0.011          |
| CPE1672          | rny          | phosphodiesterase                              | -3.89             | 0.025          |
| CPE1051          | cfa          | cyclopropane-fatty-acyl-phospholipid synthase  | -3.59             | 0.041          |
| CPE0495          | -            | mannose-1-phosphate guanylyltransferase        | -3.55             | 0.001          |
| CPE0449          | adh          | alcohol dehydrogenase                          | -3.55             | 0.000          |
| CPE0496          | -            | N-acetyl-mannosamine transferase               | -3.41             | 0.003          |
| CPE0492          | -            | capsular polysaccharide biosynthesis protein   | -3.39             | 0.015          |
| CPE0163          | pfoA         | perfringolysin O                               | -3.38             | 0.049          |
| CPE0499          | -            | hexosyltransferase                             | -3.21             | 0.004          |
| CPE1539          | -            | hypothetical protein CPE1539                   | -3.17             | 0.049          |
| CPE0491          | -            | capsular polysaccharide biosynthesis protein   | -3.04             | 0.017          |
| CPE0502          | -            | lipopolysaccharide biosynthesis protein        | -3.03             | 0.001          |
| CPE0494          | -            | NDP-suger dehydrogenase                        | -2.95             | 0.011          |
| CPE0244          | -            | hypothetical protein CPE0244                   | -2.92             | 0.003          |
| CPE0505          | -            | flippase                                       | -2.83             | 0.021          |
| CPE0504          | -            | spore coat polysaccharide biosynthesis protein | -2.78             | 0.000          |
| CPE0493          | -            | capsular polysaccharide biosynthesis protein   | -2.77             | 0.021          |
| CPE2133          | -            | radical SAM domain protein                     | -2.75             | 0.003          |
| CPE0583          | -            | phosphate ABC transporter permease             | -2.73             | 0.004          |
| CPE1228          | cbiK         | CbiK protein                                   | -2.73             | 0.002          |
| CPE2193          | atpI         | F0F1 ATP synthase subunit A                    | -2.69             | 0.000          |
| CPE0243          | -            | hypothetical protein CPE0243                   | -2.65             | 0.021          |
| CPE2284          | pilA2        | hypothetical protein CPE2284                   | -2.65             | 0.004          |
| CPE0503          | -            | hypothetical protein CPE0503                   | -2.63             | 0.022          |
| CPE0451          | -            | hypothetical protein CPE0451                   | -2.60             | 0.015          |
| CPE0957          | -            | hypothetical protein CPE0957                   | -2.49             | 0.044          |
| CPE2132          | -            | hypothetical protein CPE2132                   | -2.47             | 0.016          |
| CPE0752          | -            | hypothetical protein CPE0752                   | -2.43             | 0.035          |
| CPE1645          | -            | radical SAM domain protein                     | -2.42             | 0.005          |
| CPE2192          | atpL         | F0F1 ATP synthase subunit C                    | -2.40             | 0.000          |
| CPE1435          | hemC         | porphobilinogen deaminase                      | -2.39             | 0.003          |

|         |       |                                                                         |       |       |
|---------|-------|-------------------------------------------------------------------------|-------|-------|
| CPE1542 | -     | hypothetical protein CPE1542                                            | -2.38 | 0.000 |
| CPE0234 | -     | hypothetical protein CPE0234                                            | -2.32 | 0.044 |
| CPE1308 | -     | hypothetical protein CPE1308                                            | -2.29 | 0.016 |
| CPE0500 | -     | hexosyltransferase                                                      | -2.26 | 0.001 |
| CPE1549 | prs   | phosphoribosylpyrophosphate synthetase                                  | -2.25 | 0.017 |
| CPE0501 | -     | capsular polysaccharide biosynthesis protein                            | -2.24 | 0.000 |
| CPE1499 | comEC | late competence protein                                                 | -2.24 | 0.005 |
| CPE2548 | -     | putative methyltransferase                                              | -2.24 | 0.035 |
| CPE1224 | cbiT  | precorrin-6Y C5,15-methyltransferase<br>(decarboxylating), CbiT subunit | -2.23 | 0.032 |
| CPE1035 | -     | hypothetical protein CPE1035                                            | -2.22 | 0.006 |
| CPE1434 | hemX  | uroporphyrinogen-III<br>methyltransferase/synthase                      | -2.19 | 0.000 |
| CPE1225 | cbiE  | precorrin-6y C5,15-methyltransferase<br>(decarboxylating)               | -2.18 | 0.045 |
| CPE0450 | -     | hypothetical protein CPE0450                                            | -2.17 | 0.016 |
| CPE1221 | cbiG  | cobalamin biosynthesis protein CbiG                                     | -2.16 | 0.004 |
| CPE1437 | hemA  | glutamyl-tRNA reductase                                                 | -2.16 | 0.020 |
| CPE1396 | -     | ATP-dependent RNA helicase, DEAD/DEAH box<br>family                     | -2.15 | 0.012 |
| CPE2191 | atpF  | F0F1 ATP synthase subunit B                                             | -2.13 | 0.004 |
| CPE0235 | -     | sensor histidine kinase                                                 | -2.11 | 0.006 |
| CPE1436 | -     | precorrin-2 dehydrogenase                                               | -2.11 | 0.003 |
| CPE1541 | -     | ABC transporter                                                         | -2.09 | 0.034 |
| CPE1036 | cobS  | cobalamin synthase                                                      | -2.05 | 0.019 |
| CPE0314 | -     | hypothetical protein CPE0314                                            | -2.03 | 0.010 |
| CPE2190 | atpD  | F0F1 ATP synthase subunit delta                                         | -2.03 | 0.018 |
| CPE1040 | -     | threonine-phosphate decarboxylase                                       | -2.02 | 0.018 |
| CPE0753 | -     | hypothetical protein CPE0753                                            | -2.01 | 0.028 |
| CPE0233 | -     | iron(III) ABC transporter                                               | -1.96 | 0.011 |
| CPE2189 | atpA  | F0F1 ATP synthase subunit alpha                                         | -1.95 | 0.003 |
| CPE2025 | -     | MiaB-like tRNA modifying protein                                        | -1.95 | 0.034 |
| CPE2197 | upp   | uracil phosphoribosyltransferase                                        | -1.92 | 0.000 |
| CPE1042 | -     | iron ABC transporter                                                    | -1.92 | 0.020 |
| CPE0618 | rfbD  | dTDP-4-dehydrorhamnose reductase                                        | -1.89 | 0.003 |

|         |      |                                                                           |       |       |
|---------|------|---------------------------------------------------------------------------|-------|-------|
| CPE0620 | -    | hypothetical protein CPE0620                                              | -1.88 | 0.036 |
| CPE2026 | -    | hypothetical protein CPE2026                                              | -1.87 | 0.017 |
| CPE0979 | -    | ferritin family protein                                                   | -1.86 | 0.004 |
| CPE1227 | cbiC | precorrin-8X methylmutase                                                 | -1.86 | 0.005 |
| CPE0619 | rfbB | dTDP-glucose 4,6-dehydratase                                              | -1.86 | 0.003 |
| CPE1239 | -    | hypothetical protein CPE1239                                              | -1.85 | 0.010 |
| CPE1433 | hemB | delta-aminolevulinic acid dehydratase                                     | -1.85 | 0.000 |
| CPE1238 | -    | multidrug resistance protein                                              | -1.82 | 0.020 |
| CPE1159 | -    | aluminum resistance protein                                               | -1.81 | 0.017 |
| CPE0582 | -    | hypothetical protein CPE0582                                              | -1.81 | 0.024 |
| CPE0611 | -    | peptide chain release factor 3                                            | -1.81 | 0.007 |
| CPE0106 | -    | hypothetical protein CPE0106                                              | -1.81 | 0.025 |
| CPE1044 | -    | hypothetical protein CPE1044                                              | -1.81 | 0.021 |
| CPE0694 | -    | 3-deoxy-7-phosphoheptulonate synthase                                     | -1.79 | 0.004 |
| CPE1223 | cbiL | cobalt-precorrin-2 C(20)-methyltransferase                                | -1.79 | 0.008 |
| CPE0998 | gltX | glutamyl-tRNA synthetase                                                  | -1.78 | 0.005 |
| CPE1222 | cbiF | precorrin-4 C11-methyltransferase                                         | -1.78 | 0.001 |
| CPE1039 | cobD | cobalamin biosynthesis protein                                            | -1.78 | 0.010 |
| CPE1195 | -    | hypothetical protein CPE1195                                              | -1.77 | 0.025 |
| CPE2027 | prmA | ribosomal protein L11 methyltransferase                                   | -1.77 | 0.005 |
| CPE1520 | ilvE | branched-chain amino acid aminotransferase                                | -1.76 | 0.011 |
| CPE1920 | -    | tetratricopeptide repeat protein                                          | -1.75 | 0.037 |
| CPE1772 | -    | O-methyltransferase family protein                                        | -1.75 | 0.000 |
| CPE2186 | atpC | F0F1 ATP synthase subunit epsilon                                         | -1.74 | 0.022 |
| CPE2188 | atpG | F0F1 ATP synthase subunit gamma                                           | -1.73 | 0.007 |
| CPE2187 | atpB | F0F1 ATP synthase subunit beta                                            | -1.70 | 0.012 |
| CPE1037 | -    | hypothetical protein CPE1037                                              | -1.70 | 0.002 |
| CPE1780 | alaS | alanyl-tRNA synthetase                                                    | -1.67 | 0.034 |
| CPE1736 | -    | ribulose-phosphate 3-epimerase                                            | -1.67 | 0.032 |
| CPE1034 | cobT | nicotinate-nucleotide--dimethylbenzimidazole<br>phosphoribosyltransferase | -1.63 | 0.037 |
| CPE1247 | -    | hypothetical protein CPE1247                                              | -1.63 | 0.018 |
| CPE0117 | -    | hypothetical protein CPE0117                                              | -1.63 | 0.029 |
| CPE1432 | hemL | glutamate-1-semialdehyde aminotransferase                                 | -1.63 | 0.004 |
| CPE1019 | folE | GTP cyclohydrolase I                                                      | -1.63 | 0.013 |

|         |      |                                             |       |       |
|---------|------|---------------------------------------------|-------|-------|
| CPE1268 | adeC | adenine deaminase                           | -1.62 | 0.027 |
| CPE0115 | -    | N-acetylmuramoyl-L-alanine amidase          | -1.59 | 0.029 |
| CPE0617 | rfbC | dTDP-4-dehydrorhamnose 3,5-epimerase        | -1.59 | 0.009 |
| CPE1735 | -    | thiamine pyrophosphokinase                  | -1.59 | 0.001 |
| CPE1041 | -    | iron ABC transporter                        | -1.58 | 0.004 |
| CPE1172 | -    | haloacid dehalogenase, IB family protein    | -1.58 | 0.004 |
| CPE1500 | virS | sensor histidine kinase VirS                | -1.57 | 0.046 |
| CPE1773 | -    | hypothetical protein CPE1773                | -1.57 | 0.002 |
| CPE0972 | hisB | histidinol phosphatase                      | -1.56 | 0.022 |
| CPE0337 | -    | amino acid transporter                      | -1.55 | 0.013 |
| CPE1771 | -    | peptidase, U32 family                       | -1.55 | 0.030 |
| CPE2426 | -    | hypothetical protein CPE2426                | -1.55 | 0.002 |
| CPE1053 | -    | hypothetical protein CPE1053                | -1.53 | 0.016 |
| CPE1321 | cysE | serine O-acetyltransferase                  | -1.51 | 0.015 |
| CPE2425 | thyX | FAD-dependent thymidylate synthase          | -1.51 | 0.011 |
| CPE1540 | -    | ABC transporter                             | -1.50 | 0.046 |
| CPE0431 | -    | hypothetical protein CPE0431                | -1.49 | 0.030 |
| CPE0116 | -    | hypothetical protein CPE0116                | -1.49 | 0.017 |
| CPE1770 | -    | uridine kinase                              | -1.48 | 0.013 |
| CPE0825 | -    | hypothetical protein CPE0825                | -1.48 | 0.009 |
| CPE0676 | -    | hypothetical protein CPE0676                | -1.47 | 0.005 |
| CPE1226 | cbiD | cobalt-precorrin-6A synthase                | -1.47 | 0.004 |
| CPE0190 | -    | hypothetical protein CPE0190                | -1.46 | 0.021 |
| CPE0265 | -    | uracil-DNA glycosylase                      | -1.45 | 0.019 |
| CPE2201 | -    | hypothetical protein CPE2201                | -1.44 | 0.008 |
| CPE2198 | -    | ribose-5-phosphate isomerase B              | -1.44 | 0.001 |
| CPE0203 | -    | hypothetical protein CPE0203                | -1.43 | 0.026 |
| CPE0981 | -    | glycosyl hydrolase, family 20               | -1.43 | 0.027 |
| CPE1774 | typA | GTP-binding protein TypA                    | -1.41 | 0.001 |
| CPE0623 | -    | capsular polysaccharide synthesis protein   | -1.41 | 0.019 |
| CPE0826 | -    | hypothetical protein CPE0826                | -1.40 | 0.004 |
| CPE2166 | -    | ribosomal-protein-alanine acetyltransferase | -1.39 | 0.017 |
| CPE1496 | -    | hypothetical protein CPE1496                | -1.38 | 0.001 |
| CPE1045 | cbiP | cobyric acid synthase CobQ                  | -1.38 | 0.001 |
| CPE1374 | -    | calcium/proton exchanger                    | -1.38 | 0.015 |

|         |       |                                             |       |       |
|---------|-------|---------------------------------------------|-------|-------|
| CPE2196 | -     | UDP-N-acetylglucosamine 2-epimerase         | -1.38 | 0.004 |
| CPE0174 | mscL  | large-conductance mechanosensitive channel  | -1.37 | 0.013 |
| CPE0714 | -     | hypothetical protein CPE0714                | -1.37 | 0.011 |
| CPE0448 | -     | transcriptional regulator                   | -1.36 | 0.011 |
| CPE0827 | -     | polysaccharide deacetylase family protein   | -1.36 | 0.003 |
| CPE1866 | -     | translation-associated GTPase               | -1.36 | 0.002 |
| CPE1018 | -     | 4-amino-4-deoxychorismate lyase             | -1.36 | 0.005 |
| CPE1021 | folP  | dihydropteroate synthase                    | -1.36 | 0.017 |
| CPE0777 | rubR1 | rubredoxin                                  | -1.35 | 0.040 |
| CPE1517 | -     | hypothetical protein CPE1517                | -1.35 | 0.023 |
| CPE1219 | cbiJ  | cobalt-precorrin-6x reductase               | -1.33 | 0.003 |
| CPE0529 | -     | transporter, auxin efflux carrier family    | -1.33 | 0.047 |
| CPE1220 | cbiH  | precorrin-3B C17-methyltransferase          | -1.32 | 0.024 |
| CPE2424 | -     | RNA methyltransferase, TrmH family, group 3 | -1.32 | 0.016 |
| CPE1919 | valS  | valyl-tRNA synthetase                       | -1.30 | 0.038 |
| CPE1978 | asnA  | asparagine synthetase AsnA                  | -1.30 | 0.015 |
| CPE1582 | -     | hypothetical protein CPE1582                | -1.30 | 0.004 |
| CPE1707 | rbgA  | ribosomal biogenesis GTPase                 | -1.29 | 0.001 |
| CPE2290 | groES | co-chaperonin GroES                         | -1.29 | 0.002 |
| CPE0621 | -     | glycosyltransferase                         | -1.28 | 0.012 |
| CPE0675 | -     | hypothetical protein CPE0675                | -1.28 | 0.041 |
| CPE2289 | groEL | chaperonin GroEL                            | -1.28 | 0.004 |
| CPE1497 | -     | hypothetical protein CPE1497                | -1.27 | 0.003 |
| CPE1377 | -     | hypothetical protein CPE1377                | -1.27 | 0.002 |
| CPE2147 | -     | hypothetical protein CPE2147                | -1.26 | 0.004 |
| CPE1944 | yajC  | preprotein translocase subunit YajC         | -1.25 | 0.012 |
| CPE0965 | -     | GGDEF domain protein                        | -1.24 | 0.038 |
| CPE1548 | fdh   | molybdopterin oxidoreductase                | -1.24 | 0.027 |
| CPE1607 | -     | methionine sulfoxide reductase B            | -1.24 | 0.022 |
| CPE0622 | -     | hypothetical protein CPE0622                | -1.23 | 0.010 |
| CPE1104 | -     | hypothetical protein CPE1104                | -1.23 | 0.027 |
| CPE0624 | -     | hypothetical protein CPE0624                | -1.23 | 0.006 |
| CPE1307 | -     | hypothetical protein CPE1307                | -1.22 | 0.034 |
| CPE0862 | deaD  | ATP-dependent RNA helicase DeaD             | -1.21 | 0.018 |
| PCP50   | -     | hypothetical protein PCP50                  | -1.21 | 0.042 |

|         |       |                                                        |       |       |
|---------|-------|--------------------------------------------------------|-------|-------|
| CPE1365 | -     | hypothetical protein CPE1365                           | -1.21 | 0.010 |
| CPE0192 | cbiM  | cobalt transport protein CbiM                          | -1.20 | 0.010 |
| CPE1016 | pabA  | anthranilate synthase component II                     | -1.20 | 0.021 |
| CPE0184 | nanP  | N-acetylmannosamine-6-phosphate 2-epimerase            | -1.20 | 0.025 |
| CPE0971 | -     | hypothetical protein CPE0971                           | -1.19 | 0.022 |
| CPE0945 | -     | hypothetical protein CPE0945                           | -1.18 | 0.013 |
| CPE1655 | -     | hypothetical protein CPE1655                           | -1.18 | 0.028 |
| CPE1958 | -     | hypothetical protein CPE1958                           | -1.17 | 0.024 |
| CPE2127 | obgE  | GTPase ObgE                                            | -1.17 | 0.001 |
| CPE1196 | -     | hypothetical protein CPE1196                           | -1.17 | 0.047 |
| CPE0305 | -     | ABC transporter                                        | -1.17 | 0.015 |
| CPE0774 | -     | hypothetical protein CPE0774                           | -1.16 | 0.008 |
| CPE2569 | -     | glutamine synthetase                                   | -1.16 | 0.013 |
| CPE1431 | -     | FAD flavoprotein oxidase                               | -1.16 | 0.026 |
| CPE1081 | -     | hypothetical protein CPE1081                           | -1.16 | 0.007 |
| CPE2281 | pilO  | hypothetical protein CPE2281                           | -1.16 | 0.046 |
| CPE0306 | -     | hypothetical protein CPE0306                           | -1.16 | 0.046 |
| CPE2200 | -     | Sua5/YciO/YrdC/YwIc family protein                     | -1.15 | 0.006 |
| CPE1956 | -     | GntR family transcriptional regulator/aminotransferase | -1.14 | 0.004 |
| CPE1991 | -     | hypothetical protein CPE1991                           | -1.13 | 0.003 |
| CPE0735 | -     | YeeE/YedE family protein                               | -1.12 | 0.007 |
| CPE0367 | -     | RNA methyltransferase                                  | -1.12 | 0.002 |
| CPE1823 | folD  | folD bifunctional protein                              | -1.12 | 0.009 |
| CPE1218 | -     | ABC transporter                                        | -1.12 | 0.013 |
| CPE1322 | cysK  | cysteine synthase A                                    | -1.12 | 0.005 |
| CPE2217 | -     | peptidase family protein                               | -1.11 | 0.030 |
| CPE2286 | pilB2 | secretion system protein E                             | -1.11 | 0.045 |
| CPE2015 | era   | GTP-binding protein Era                                | -1.11 | 0.006 |
| CPE0092 | -     | putative symporter YidK                                | -1.11 | 0.035 |
| CPE1038 | cobC  | alpha-ribazole-5'-phosphate phosphatase                | -1.11 | 0.002 |
| CPE1976 | dacF  | D-alanyl-D-alanine carboxypeptidase                    | -1.11 | 0.017 |
| CPE0275 | -     | haloacid dehalogenase, IA family protein               | -1.11 | 0.033 |
| CPE0964 | -     | hypothetical protein CPE0964                           | -1.10 | 0.042 |

|         |           |                                                                                                |       |       |
|---------|-----------|------------------------------------------------------------------------------------------------|-------|-------|
| CPE0884 | -         | ABC transporter                                                                                | -1.09 | 0.006 |
| CPE0164 | -         | hypothetical protein CPE0164                                                                   | -1.09 | 0.011 |
| CPE1709 | trmD      | tRNA (guanine-N(1)-)-methyltransferase                                                         | -1.09 | 0.032 |
| CPE0539 | -         | NAD-dependent 4-hydroxybutyrate dehydrogenase                                                  | -1.09 | 0.002 |
| CPE2070 | -         | tRNA 2-selenouridine synthase                                                                  | -1.08 | 0.001 |
| CPE0857 | -         | hypothetical protein CPE0857                                                                   | -1.08 | 0.036 |
| CPE1822 | xseA      | exodeoxyribonuclease VII large subunit                                                         | -1.08 | 0.030 |
| CPE1787 | -         | recombination factor protein RarA                                                              | -1.08 | 0.007 |
| CPE1188 | -         | UDP-N-acetylmuramyl tripeptide synthetase                                                      | -1.07 | 0.046 |
| CPE1253 | -         | hypothetical protein CPE1253                                                                   | -1.07 | 0.043 |
| CPE1022 | folA/folK | dihydroneopterin aldolase/ 2-amino-4-hydroxy-6-hydroxymethyldihydropteridine pyrophosphokinase | -1.07 | 0.032 |
| CPE0970 | -         | Na <sup>+</sup> /H <sup>+</sup> antiporter                                                     | -1.07 | 0.031 |
| CPE1231 | -         | surface protein                                                                                | -1.07 | 0.008 |
| CPE1430 | clsD      | cardiolipin synthase                                                                           | -1.07 | 0.025 |
| CPE1284 | -         | pyrimidine nucleoside transporter                                                              | -1.06 | 0.005 |
| CPE0696 | aroA      | 3-phosphoshikimate 1-carboxyvinyltransferase                                                   | -1.06 | 0.023 |
| CPE0524 | -         | HAD hydrolase, IIB family                                                                      | -1.06 | 0.016 |
| CPE1302 | tpiA      | triosephosphate isomerase                                                                      | -1.05 | 0.004 |
| CPE0506 | galF      | UTP-glucose-1-phosphate uridylyltransferase                                                    | -1.05 | 0.039 |
| CPE1217 | -         | ABC transporter                                                                                | -1.05 | 0.032 |
| CPE1818 | hlyD      | hemolysin A                                                                                    | -1.04 | 0.004 |
| CPE1546 | -         | hypothetical protein CPE1546                                                                   | -1.04 | 0.004 |
| CPE2322 | thrS      | threonyl-tRNA synthetase                                                                       | -1.04 | 0.039 |
| CPE1271 | -         | ABC transporter                                                                                | -1.03 | 0.013 |
| CPE1470 | -         | prbable ABC transporter                                                                        | -1.03 | 0.029 |
| CPE1918 | folC      | FolC bifunctional protein                                                                      | -1.03 | 0.012 |
| CPE1885 | pheT      | phenylalanyl-tRNA synthetase subunit beta                                                      | -1.03 | 0.001 |
| CPE2283 | pilM      | type IV pilus assembly protein PilM                                                            | -1.02 | 0.039 |
| CPE1166 | -         | lysine specific permease                                                                       | -1.01 | 0.044 |
| CPE0659 | -         | hypothetical protein CPE0659                                                                   | -1.01 | 0.046 |
| CPE1192 | -         | two-component sensor histidine kinase                                                          | -1.01 | 0.006 |
| CPE0283 | -         | hypothetical protein CPE0283                                                                   | -1.01 | 0.030 |

|                |             |                                                |              |              |
|----------------|-------------|------------------------------------------------|--------------|--------------|
| <b>CPE1819</b> | -           | <b>1-deoxy-D-xylulose-5-phosphate synthase</b> | <b>-1.00</b> | <b>0.023</b> |
| <b>CPE2014</b> | <b>recO</b> | <b>DNA repair protein RecO</b>                 | <b>-1.00</b> | <b>0.008</b> |



**Supplementary table S4. Signal peptide prediction of abundant extracellular proteins.**

| Locus   | Gene          | Cleavage site* | Score* | Signal peptide |
|---------|---------------|----------------|--------|----------------|
| CPE0036 | <i>plc</i>    | 28             | 0.66   | YES            |
| CPE0163 | <i>pfoA</i>   | 28             | 0.755  | YES            |
| CPE0173 | <i>colA</i>   | 39             | 0.486  | YES            |
| CPE0202 | <i>spoIIQ</i> | 28             | 0.629  | YES            |
| CPE0278 | <i>cwlO</i>   | 24             | 0.563  | YES            |
| CPE0846 | <i>ccp</i>    | 30             | 0.806  | YES            |
| CPE1281 | -             | 30             | 0.806  | YES            |

\*Cleavage site and signal peptide are predicted by SignalP 4.1 (<http://www.cbs.dtu.dk/services/SignalP/>)

```

cac      .....MNNINK.....IITIVCLVIIITIVMYIRRKVAAAKISKABEDAKKIKEDAKKREAITLKKBAILEAK
ctc      ...MTLSKLLYLISAIDYLNNTKSKGGAHNLNTYIVAVIIIAVIAVIVVYIIRKNSAAKISNABERGRNIEDAKKREASKKBALBEAK
cbo      .....MGPTK.....IIVAVIIICVILGLYIVDKAAKAKLSEASKEARNLKKEAARDASKKBALBEAK
cpe      MTPFYAKCFYRENKRGMVAVVVG.....VLIIGTIIILVGFICVYLIQAKSKNRVSELEKESALILEAKKREASKKBALBEAK
cbe      .....MPTAVM.....VLIIDVIVLLIGLVVYKTIQNTSKAKTESLEKESALILEAKKREASKKBALBEAK
bsu      .....MPTIMM.....VLIISTILLIGLVVYFVFKTIAEAKIAGARGAEQIILEDARRDASAKKBALBEAK
cdf      .....MDVIDS.....VVMVIGAAVGIACVYFVRKNISEAKIQAENLAKKPIIDAKHHDSEIVQKKEALEAK
consensus>70  .....m.....Ii..i..iv..yi.....aki..ae..a..i.edAkr#aE..kKEa..LEAK

cac      70      80      90      100     110     120     130     140
cac      EAKRRLSDLDKRETRRRNEIQRLERRNIQREELDKKND.....LLPKRENGLNLRENSIQERQNTIEQLYKBERERFEOLSGLTSE
ctc      EEMERLNDNDFEKESKDRRNICORLEERRIICRBEALDKKGD.....MLPKKEESLNKKHQELENNKKSNIENLYEKQREPERLALGLTSD
cbo      EBAEKLRAEVEENRRRNEVORLEERRIICRBEALDKKSE.....ALPKKEEALNKKQOKIEDVTHEMELHEKQRTPERISGLTSE
cpe      EAVKLRADLDKRETRRRNEIQRFERRLIQREBELDKKGE.....MLPKREDSINKKSIIEIQELEERVONLYEQRABEERISGLTSE
cbe      EELKLRADLDKRETRRRNEIQRLERRLIQREBELDKKSE.....LLPKKDEITINRMLEVDQVBARVQKLYEERABEERISALSSE
bsu      DEIKLRIDAEAEVRRRRNEIQENRLLQREBELDKKGEGLDKREAMLEKDKHSLNRQHQIEEMESKVDIMIRMQSSPERISGLTSD
cdf      EELKLRTEAEERRRRNEVOKYERRVVQREBELDKKIQ.....NLSKENVLSLKLKVVEKREVEVIMKQQQLPERISGLTSD
consensus>70  #E.HkR.#.#.E.rRRnEiQr.ErR.iQ.EE.LdkK.#.....mLEkk#e.ln.....i#e.e..v#n1...qr.eLEris.lts#

cac      150     160     170     180     190     200     210     220     230
cac      EAKRLLIEVNRREIKHEKSIMIKVEVQRAKEEADKKAREITTYAICRCAADHVAEETVVVSLPNDEMKGRIIGREGNRIRTEITLTCVD
ctc      CAKEMLDIEVNRKEIKHEIAMLIEVEVTRAKEEADKKAREITTYAICRCAADHVAEETVVVSLPNDEMKGRIIGREGNRIRTEITLTCVD
cbo      CAKEFLDIEVNRKEIKHEIAMVIEVEVTRAKEEADKKAREITTYAICRCAADHVAEETVVVSLPNDEMKGRIIGREGNRIRTEITLTCVD
cpe      EARLLDIEVNRREIKHEIAMLIEVEVTRAKEEADKKAREITTYAICRCAADHVAEETVVVSLPNDEMKGRIIGREGNRIRTEITLTCVD
cbe      EAKRLLIEVNRREIKHEIAMLIEVEVTRAKEEADKKAREITTYAICRCAADHVAEETVVVSLPNDEMKGRIIGREGNRIRTEITLTCVD
bsu      EAKRLLIEVNRREIKHEIAMLIEVEVTRAKEEADKKAREITTYAICRCAADHVAEETVVVSLPNDEMKGRIIGREGNRIRTEITLTCVD
cdf      EAKRLLIEVNRREIKHEIAMLIEVEVTRAKEEADKKAREITTYAICRCAADHVAEETVVVSLPNDEMKGRIIGREGNRIRTEITLTCVD
consensus>70  eAke.lLeev..#i.#.a.#ik#iE.kAKEEADKkar#iic.AiQrCAADHVaeTtV.VV.LPNDEMKGRIIGREGNRIRTEITLTCVD

cac      240     250     260     270     280     290     300     310     320
cac      LIIDDTEAVILSDFDPVRRREVAKVALKLIIDGRIHPARIEEMVEKAKKEVENNKKEEGECAFTECVHGHLESELIRLGRKYRTSYG
ctc      LIIDDTEAVILSDFDPVRRREVARIALKLIIDGRIHPARIEEMVEKAKKEVENNRREEGECAFTECVHGHLESELIKLGRKYRTSYG
cbo      LIIDDTEAVILSDFDPVRRREVARIALKLIIDGRIHPARIEEMVEKAKKEVEISKKEEGECAFTECVHGHLESELIRLGRKYRTSYG
cpe      LIIDDTEAVILSDFDPVRRREVARIALKLIIDGRIHPARIEEMVERAKDVENDKKEEGECAFTECVHGHLESELIRLGRKYRTSYG
cbe      LIIDDTEAVILSDFDPVRRREVARIALKLIIDGRIHPARIEEMVERAKDVESSKKEEGECAFTECVHGHLESELIRLGRKYRTSYG
bsu      LIIDDTEAVILSDFDPVRRREVARIALKLIIDGRIHPARIEEMVEKSRREVDDVRRREGECAFTECVHGHLESELIRLGRKYRTSYG
cdf      LIIDDTEAVILSDFDPVRRREVARIALKLIIDGRIHPARIEEMVEKARKEVDNIRKKEEGECAFTECVHGHLESELIRLGRKYRTSYG
consensus>70  LIIDDTEAVILS.FDPVRRREVARIAL#KLI.DGRIHPARIEEMVeka.k#v#n.kEeEGEcafTe.CVHGh.#i.lLGRk%RTSYG

cac      330     340     350     360     370     380     390     400     410
cac      QNVLKHSIEVSYLAGMASAEIIGDPTAKRAGLLHDIGRAVDHEVEGPHALIGAEVSKRYRDEPLIVNAIAGAHGDMVBPQSLBAIIVQAA
ctc      QNVLKHSIEVSYLAGMASAEIIGDPTAKRAGLLHDIGRAVDHEVEGPHALIGAEVAKRYRDESLIVNAIAGAHGDMVBPQSLBAIIVQAA
cbo      QNVLKHSIEVSYLAGMASAEIIGDPTAKRAGLLHDIGRAVDHEVEGPHALIGAEVAKRYRDESLIVNAIAGAHGDMVBPQSLBAIIVQAA
cpe      QNVLKHSIEVSYLAGMASAEIIGDPTAKRAGLLHDIGRAVDHEVEGPHALIGAEVAKRYRDESLIVNAIAGAHGDMVBPQSLBAIIVQAA
cbe      QNVLKHSIEVSYLAGMASAEIIGDPTAKRAGLLHDIGRAVDHEVEGPHALIGAEVAKRYRDESLIVNAIAGAHGDMVBPQSLBAIIVQAA
bsu      QNVLKHSIEVSYLAGMASAEIIGDPTAKRAGLLHDIGRAVDHEVEGPHALIGAEVAKRYRDESLIVNAIAGAHGDMVBPQSLBAIIVQAA
cdf      QNVLKHSIEVSYLAGMASAEIIGDPTAKRAGLLHDIGRAVDHEVEGPHALIGAEVAKRYRDESLIVNAIAGAHGDMVBPQSLBAIIVQAA
consensus>70  QNVLKHSIEVSYLAGMASAEIIGDPTAKRAGLLHDIGRAVDHEVEGPHALIGAEVAKRYRDESLIVNAIAGAHGDMVBPQSLBAIIVQAA

cac      420     430     440     450     460     470     480     490     500
cac      DAISAARPGARRETLEAVIKRLEKLEETANSYEGVEKSAIQAAGREIRIVKPEVVDVAGSIEMARCIIVKKEIEGLEYPGGIKVNVIRET
ctc      DAISAARPGARRETLEAVIKRLEKLEETANSYEGVEKSAIQAAGREIRIVKPEVVDVAGSIEMARCIIVKKEIEGLEYPGGIKVNVIRET
cbo      DAISAARPGARRETLEAVIKRLEKLEETANSYEGVEKSAIQAAGREIRIVKPEVVDVAGSIEMARCIIVKKEIEGLEYPGGIKVNVIRET
cpe      DAISAARPGARRETLEAVIKRLEKLEETANSYEGVEKSAIQAAGREIRIVKPEVVDVAGSIEMARCIIVKKEIEGLEYPGGIKVNVIRET
cbe      DAISAARPGARRETLEAVIKRLEKLEETANSYEGVEKSAIQAAGREIRIVKPEVVDVAGSIEMARCIIVKKEIEGLEYPGGIKVNVIRET
bsu      DAISAARPGARRETLEAVIKRLEKLEETANSYEGVEKSAIQAAGREIRIVKPEVVDVAGSIEMARCIIVKKEIEGLEYPGGIKVNVIRET
cdf      DAISAARPGARRETLEAVIKRLEKLEETANSYEGVEKSAIQAAGREIRIVKPEVVDVAGSIEMARCIIVKKEIEGLEYPGGIKVNVIRET
consensus>70  DAISAARPGARRETLEAVIKRLEKLEETANSYEGVEKSAIQAAGREIRIVKPEVVDVAGSIEMARCIIVKKEIEGLEYPGGIKVNVIRET

cac      510
cac      RAVEYAK
ctc      .....
cbo      RAIEYAK
cpe      RAVDYAK
cbe      RAVDFAK
bsu      RAVEYAK
cdf      RAIEYAK
consensus>70  raveyak

```

**Supplementary figure S1** The *rny* gene is highly conserved in *Clostridia*. A multiple sequence alignment of the RNase Y amino acid sequences of Clostridial species is shown. The bacterial species used for the alignment are as followed: cac, *C. acetobutylicum* ATCC 824; ctc, *C. tetani* E88; cbo, *C. botulinum* A ATCC 3502; cpe, *C. perfringens* strain 13; bsu, *B. subtilis* 168; cdf, *Peptoclostridium difficile* 630.

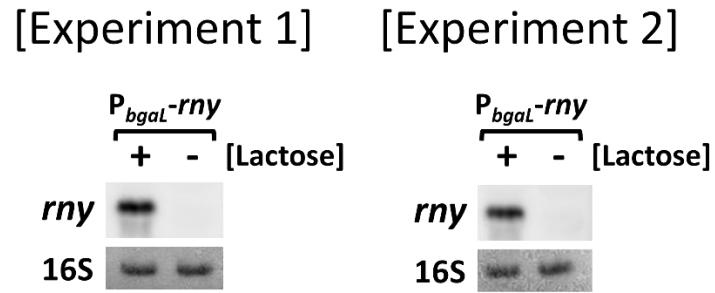

**Supplementary figure S2** The *rny* expression is robustly regulated by lactose. Northern blot analysis of the *rny* gene. Each lane contained 2  $\mu$ g of total RNA isolated from the culture at the mid-exponential phase. The *rny* conditional knockdown strain was cultured with or without 1 mM lactose to induce *rny* gene expression under the *bgaL* promoter. 16S rRNA stained with methylene blue on the blots is indicated at the bottom as a loading control.

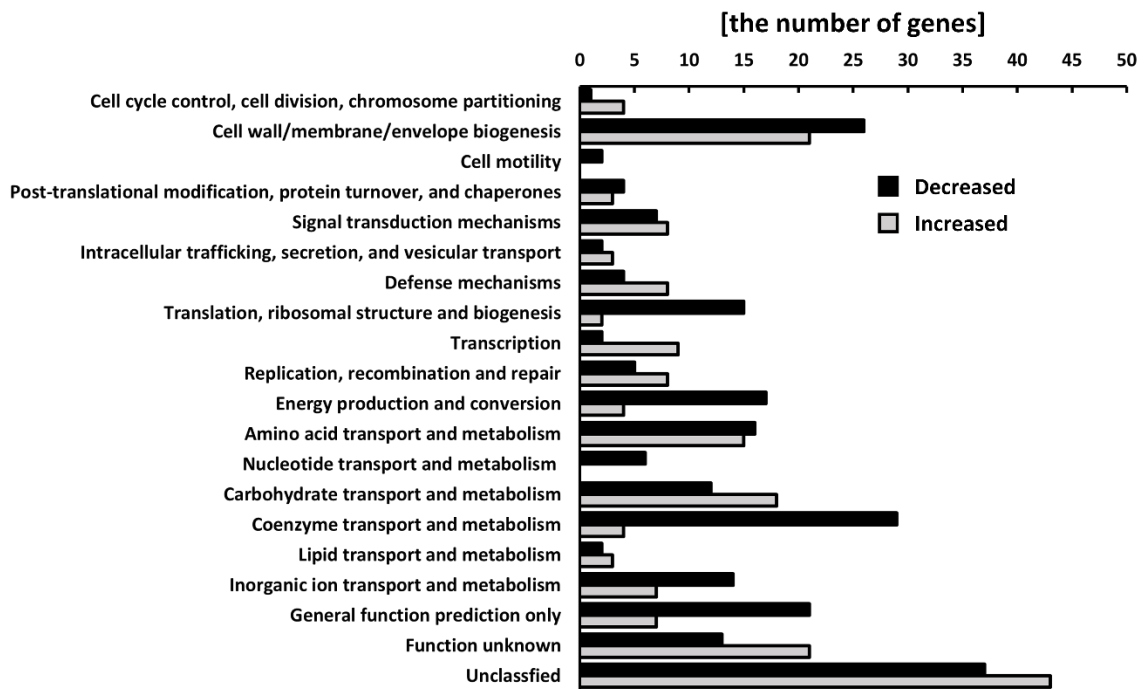

**Supplementary figure S3** Functional classes of genes whose expression was affected by RNase Y-depletion.

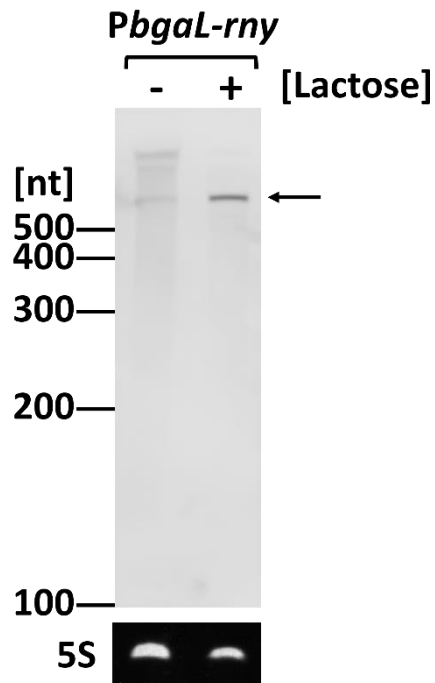

**Supplementary figure S4** Northern blotting of *pilA2* mRNA in the *rny*-depleted condition. Total RNA was isolated from the culture at the mid-exponential phase at 37°C with or without lactose, and 2 µg of RNA was dissolved in urea denaturing PAGE. The *pilA2* mRNA were detected using DIG-labeled specific DNA probes. The 5S rRNA stained with ethidium bromide is indicated on the bottom as a loading control.

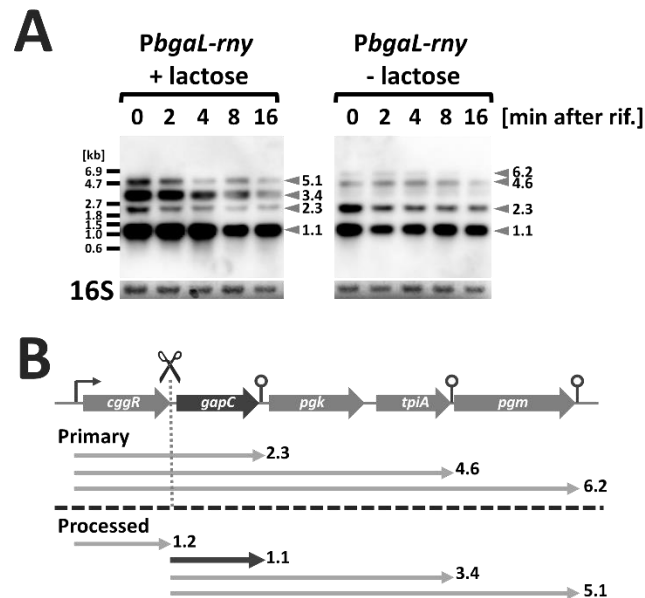

**Supplementary figure S5** RNase Y is involved in the processing and expression of *cggR-gapC-pgk-tpiA-pgm* operon in *C. perfringens*. (A) Northern blot analysis of the *gapC* gene. Each lane contained 2  $\mu\text{g}$  of total RNA isolated from the culture at the mid-exponential phase. The *rny* conditional knockdown strain was cultured with or without 1 mM lactose to induce *rny* gene expression under the *bgaL* promoter. 16S rRNA stained with methylene blue on the blots is indicated at the bottom as a loading control. (B) Schematic representation of the *cggR-gapC-pgk-tpiA-pgm* operon. The predicted transcriptional start site and terminators are indicated by a bent arrow and stem-loop structures, respectively. Arrows represent the transcripts detected in the northern blots. The scissor symbol indicates a putative processing site.

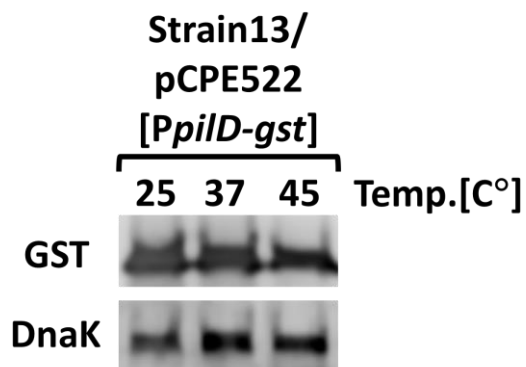

**Supplementary figure S6** Temperature does not affect the *pilD* promoter activity. Western blot analysis is carried out using 0.2 O.D.<sub>600</sub> unit of intracellular proteins isolated from *C. perfringens* strain 13 harboring pCPE522 vector in which the *pilD* promoter is transcriptionally fused to *colA* RBS and GST ORF. DnaK proteins detected by using anti *B. subtilis* DnaK-antibody are shown on bottom as an internal control.
